# Supplementary material for: Optimality criteria for futility stopping boundaries for group sequential designs with a continuous endpoint
Source: PubMed Central journal article supplement (PMC7643306; doi:10.1186/s12874-020-01141-5), 2020-11-05
Supplement: 12874_2020_1141_MOESM1_ESM.pdf [file 12874_2020_1141_MOESM1_ESM.pdf]

```
#####
#####
#       optimal futility bound program v1.0           #
# Package dependency:                               #
# mvtnorm                                           #
#                                                   #
# Input:                                           #
# delta:      effect size                          #
# n12:       total sample size                     #
# alpha_1:    efficacy boundary at stage 1         #
# alpha_2:    efficacy boundary at stage 2/final   #
# inffrac:    information fraction                 #
# power_loss: power loss (admissible condition parameter) #
# pi_wrong:   probability of wrongly stopping (admissible condition parameter)#
# precision:  precision for the futility boundary. default 1E-5 #
#                                                   #
# Output:                                           #
# power_loss: power loss (as input)                 #
# pi_wrong:   probability of wrongly stopping (as input) #
# alpha0_opt: optimal futility boundary             #
# prob_wrong_fut: probability of wrongly stopping for futility #
# prob_halfdel_fut: probability of correctly stopping for futility under half delta #
# prob_zerodel_fut: probability of correctly stopping for futility under 0 delta #
#                                                   #
#####

#load mvtnorm package

library(mvtnorm)

#define the core function optimal_fut_bound

optimal_fut_bound <- function(delta, n_12, alpha_1, alpha_2, inffrac, power_loss, pi_wrong,
precision = 1E-5){
```

```

#test statistic at stage 1 and stage 2/final
T_1 <- delta*sqrt((n_12*infofrac)/4)
T_12 <- delta*sqrt(n_12/4)

#covariance of the joint distribution T_1 and T_12
cov_mtx <- matrix(c(1,sqrt(infofrac), sqrt(infofrac), 1), ncol=2)

#beta = 1- power of two-stage group sequential design with efficacy boundaries alpha_1 and
alpha_2
beta <- pmvnorm(lower = c(-Inf,-Inf),
                upper = c(qnorm(1-alpha_1),qnorm(1-alpha_2)),
                mean = c(T_1,T_12),
                sigma = cov_mtx)

#bisectional search for alpha0, the futility boundary starting bounded between
#wrongly stopping at stage 1 (lower) and no stopping (upper), with initial precision of 1
alpha0_upper <- 1
alpha0_lower <- 1 - pnorm(qnorm(pi_wrong) + T_1)
prec <- 1

while(prec > precision){
  #search start with the middle point at each step
  alpha0_opt <- (alpha0_lower + alpha0_upper) / 2

  #actual power for search
  power_actual <- 1 - pnorm(qnorm(1-alpha_1), T_1, 1) +
    pmvnorm(lower = c(qnorm(1-alpha0_opt), qnorm(1-alpha_2)),
            upper = c(qnorm(1-alpha_1),Inf),
            mean = c(T_1,T_12),
            sigma = cov_mtx)

  #update the search area to be bounded by the searched point either as the upper or the lower
  limit
  ifelse(power_actual < 1 - beta - power_loss, alpha0_lower <- alpha0_opt, alpha0_upper <-
  alpha0_opt)
}

```

```

#update the searched precision
prec <- alpha0_upper - alpha0_lower
}

#further performance characteristics
prob_wrong_fut <- pnorm(qnorm(1-alpha0_opt) - T_1)
prob_halfdel_fut <- pnorm(qnorm(1-alpha0_opt) - 0.5*T_1)
prob_zerodel_fut <- pnorm(qnorm(1-alpha0_opt))

return(list("power_loss" = power_loss,
           "pi_wrong" = pi_wrong,
           "alpha0_opt" = alpha0_opt,
           "power_actual" = power_actual,
           "prob_wrong_fut" = prob_wrong_fut,
           "prob_halfdel_fut" = prob_halfdel_fut,
           "prob_zerodel_fut" = prob_zerodel_fut)
)
}

#The following code can be used to create Table 1
for (pi_wrong in c(0.01,0.05,0.1)){
  for (power_loss in seq(0.01,0.05,0.04)){
    x <- optimal_fut_bound(delta = 0.5, n_12 = 188, alpha_1 = 0.0147, alpha_2 = 0.0147, infofrac = 0.5,
power_loss, pi_wrong)

    print(paste("Powloss = ", power_loss, ", piwrong = ", format(pi_wrong, nsmall=2), ", alpha0_opt= ",
format(round(x$alpha0_opt,2), nsmall=2),
           ", ActualPower = ", format(round(x$power_actual, 2), nsmall=2), ", Pwrong = ",
format(round(x$prob_wrong_fut, 2), nsmall=2),
           ", Pcorrect1/2 = ", format(round(x$prob_halfdel_fut, 2), nsmall=2),", Pcorrect0 = ",
format(round(x$prob_zerodel_fut, 2), nsmall=2)))
  }
}

```
